# Supplementary material for: Phytoconstituents with Radical Scavenging and Cytotoxic Activities from Diospyros shimbaensis
Source: PubMed Central journal article supplement (PMC5456303; doi:10.3390/diseases4010003), 2016-01-15
Supplement: diseases-04-00003-s001.pdf [file diseases-04-00003-s001.pdf]

# Supplementary Materials: Phytoconstituents with Radical Scavenging and Cytotoxic Activities from *Diospyros shimbaensis*

Per Aronsson <sup>1</sup>, Joan J. E. Munissi <sup>2,\*</sup>, Amra Gruhonjic <sup>1,3</sup>, Paul A. Fitzpatrick <sup>3</sup>, Göran Landberg <sup>3</sup>, Stephen S. Nyandoro <sup>2,\*</sup> and Mate Erdelyi <sup>1,4,\*</sup>

## 1. NMR and Mass Spectra of 8,8'-Oxo-biplumbagin (1)

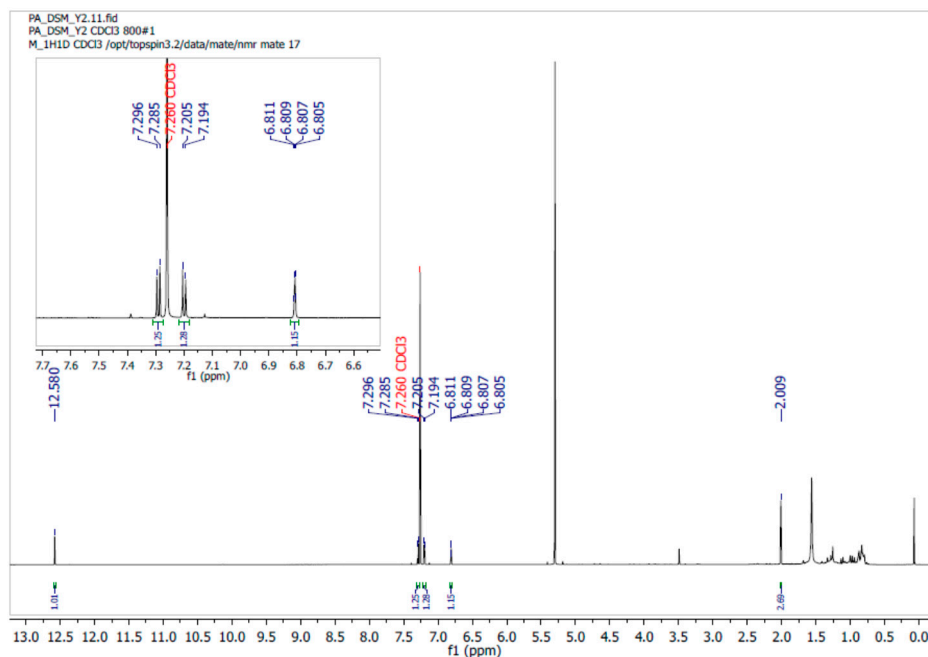

Figure S1. The <sup>1</sup>H-NMR spectrum of 8,8'-oxo-biplumbagin (1, CDCl<sub>3</sub>, 25 °C, 799.88 MHz).

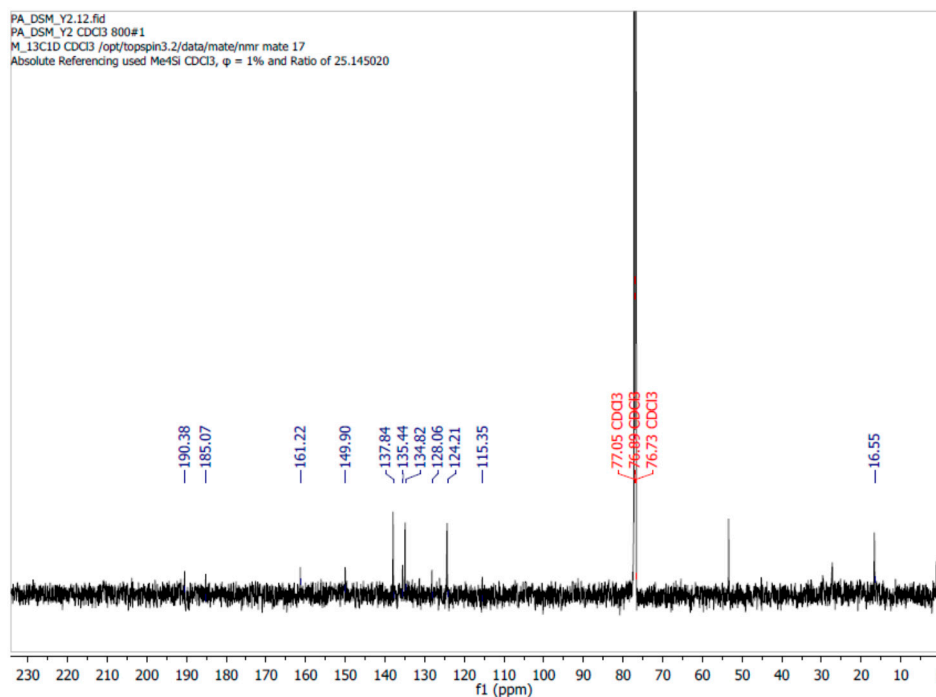

Figure S2. The <sup>13</sup>C-NMR spectrum of 8,8'-oxo-biplumbagin (1, CDCl<sub>3</sub>, 25 °C, 201.20 MHz).

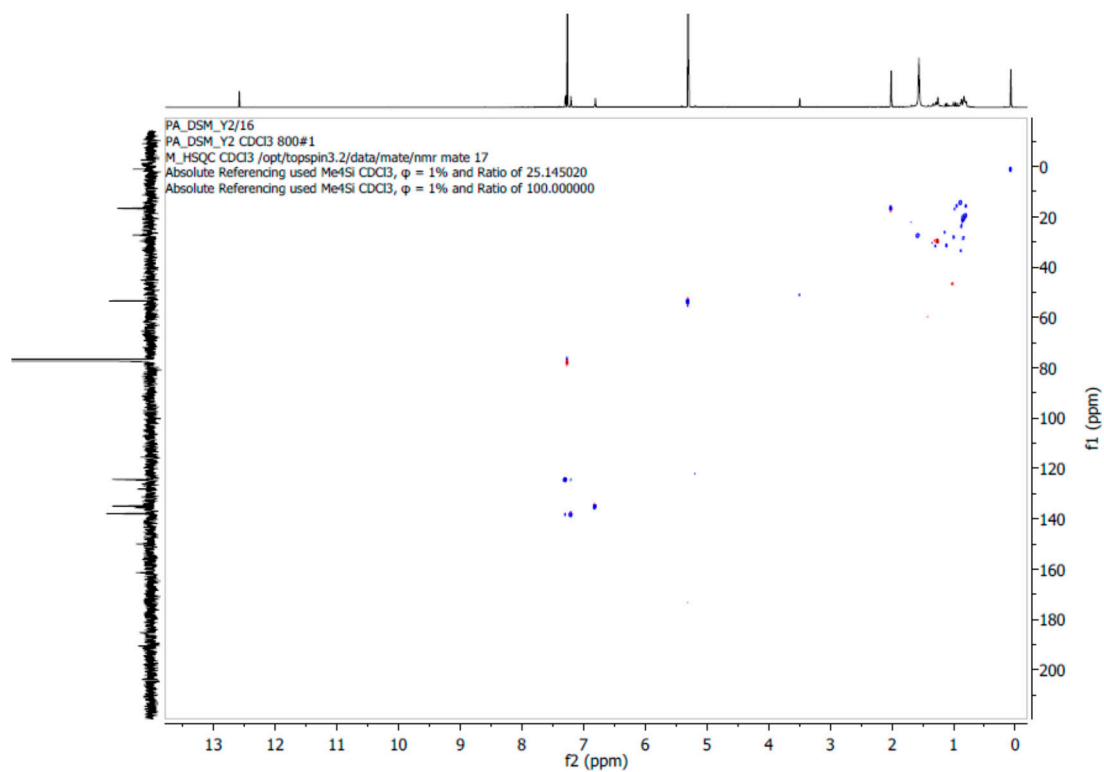

Figure S3. The  $^1\text{H}$ - $^{13}\text{C}$ -HSQC spectrum of 8,8'-oxo-biplumbagin (**1**,  $\text{CDCl}_3$ , 25 °C, 201.20 MHz).

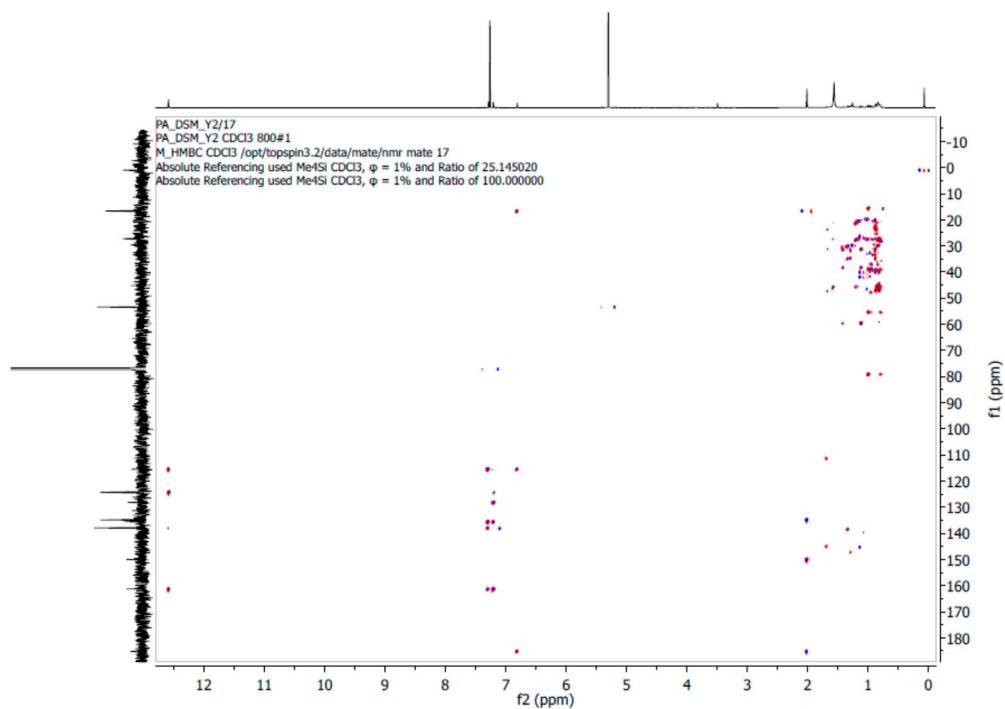

Figure S4. The  $^1\text{H}$ - $^{13}\text{C}$ -HMBC spectrum of 8,8'-Oxo-biplumbagin (**1**,  $\text{CDCl}_3$ , 25 °C, 201.20 MHz).

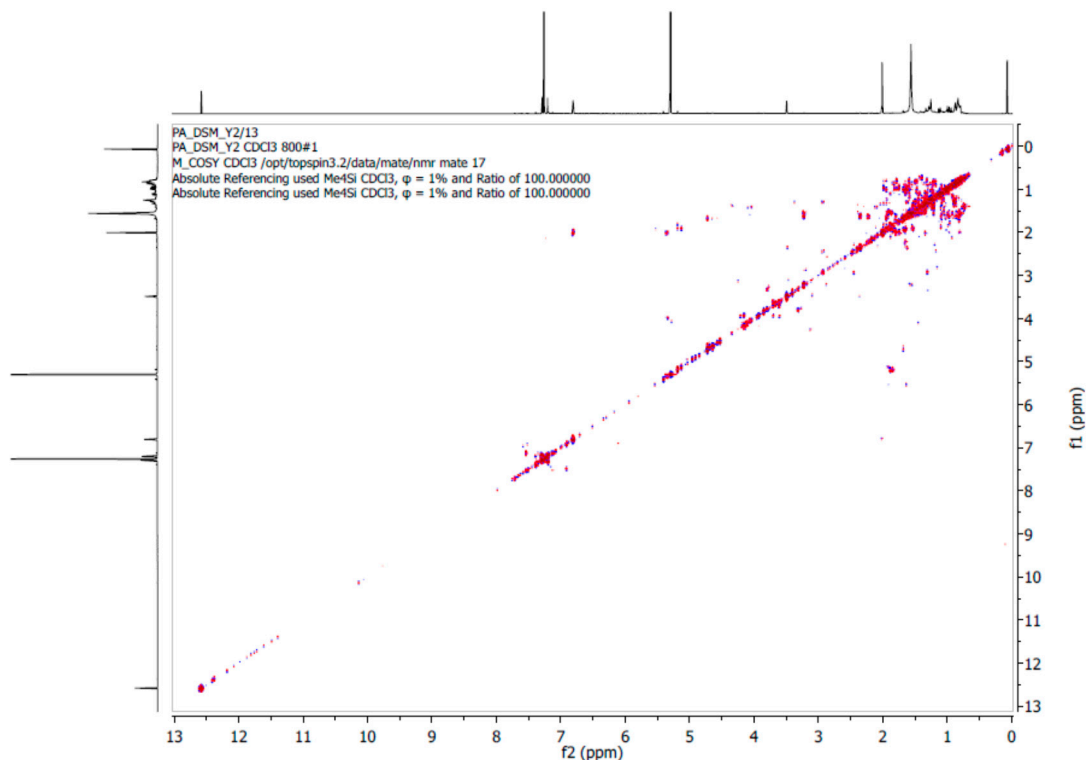

Figure S5. The  $^1\text{H}$ - $^1\text{H}$  COSY spectrum of 8,8'-oxo-biplumbagin (**1**,  $\text{CDCl}_3$ , 25  $^\circ\text{C}$ , 799.88 MHz).

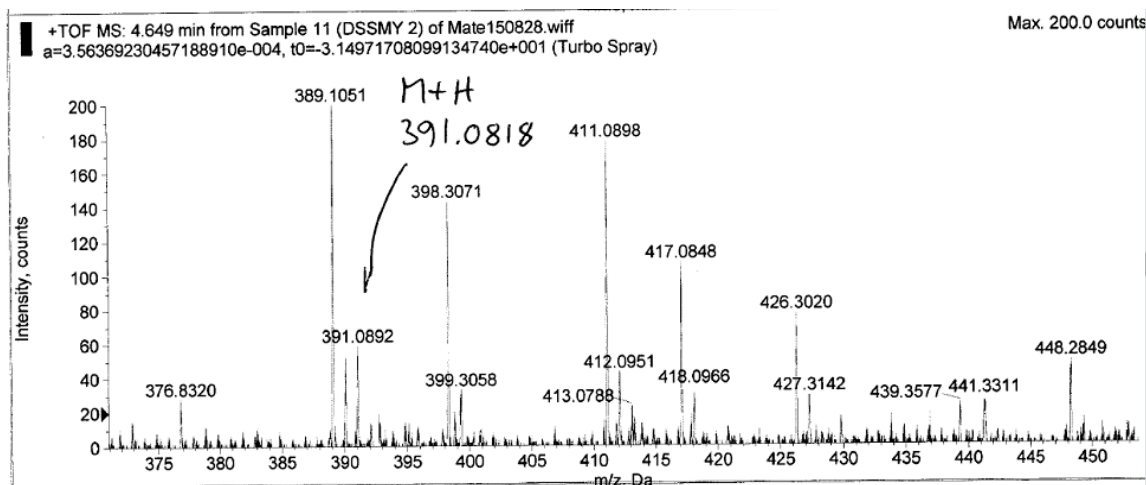

Figure S6. The HR (ESI) mass spectrum of 8,8'-oxobioplumbagin (**1**).

## 2. Spectroscopic Data of the Known Compounds 2–5

*trans*-Isoshinanolone (**2**) [1]. White amorphous solid.  $^1\text{H}$ -NMR ( $\text{CDCl}_3$ , 25  $^\circ\text{C}$ )  $\delta$  (799.88 MHz, ppm): 1.19 (3H, *d*,  $J = 6.6$  Hz, C-11), 1.92 (1H, *d*,  $J = 6.6$  Hz, 1-OH), 2.29 (1H, *dddq*,  $J = 10.1, 7.3, 6.6, 4.1$  Hz, H-2), 2.44 (1H, *dd*,  $J = 17.4, 10.1$  Hz, H-3a), 2.93 (1H, *dd*,  $J = 17.4, 4.2$  Hz, H-3b), 4.51 (1H, *brt*,  $J = 6.9$  Hz, H-1), 6.94 (1H, *dd*,  $J = 8.4, 0.9$  Hz, H-6), 7.12 (1H, *t*,  $J = 8$  Hz, H-8), 7.51 (1H, *dd*,  $J = 8.4, 7.6$  Hz, H-7), 12.48 (1H, *s*, 5-OH);  $^{13}\text{C}$ -NMR ( $\text{CDCl}_3$ , 25  $^\circ\text{C}$ )  $\delta$  (201.20 MHz, ppm), 18.0 (C-11), 37.7 (C-2), 43.6 (C-3), 73.9 (C-1), 115.5 (C-10), 117.3 (C-8), 117.5 (C-6), 137.2 (C-7), 146.0 (C-9), 162.7 (C-5), 204.8 (C-4). IR ( $\text{CHCl}_3$ )  $\text{cm}^{-1}$ : 3620, 1617. GC-MS (70 eV):  $m/z$  192 [ $\text{M}$ ] $^+$  (100), 177 (25), 150 (45), 121 (90).

*cis*-Isoshinanolone (**3**) [28]. White amorphous solid.  $^1\text{H}$ -NMR ( $\text{CDCl}_3$ , 25  $^\circ\text{C}$ )  $\delta$  (799.88 MHz, ppm): 1.2 (3H, *d*,  $J = 6.9$  Hz, 2- $\text{CH}_3$ ), 2.4 (1H, *dddq*,  $J = 11.0, 7.0, 4.2, 2.8$  Hz, H-2), 2.9 (1H,  $J = 17.5, 11.0$  Hz, H-3a), 2.6 (1H, *dd*,  $J = 17.5, 4.3$  Hz, H-3b), 4.8 (1H, *d*,  $J = 2.8$  Hz, H-1), 6.9 (1H, *dd*,  $J = 8.5, 1.1$  Hz, H-6), 6.9 (1H, *d*,  $J = 7.4$  Hz, H-8); 7.5 (1H, *dd*,  $J = 8.4, 7.4$  Hz), 12.4 (1H, *s*, 5-OH).  $^{13}\text{C}$ -NMR ( $\text{CDCl}_3$ , 25  $^\circ\text{C}$ )  $\delta$  (201.20 MHz,

ppm): 16.3 (C-11), 34.6 (C-2), 40.9 (C-3), 71.3 (C-1), 115.1 (C-10), 118.4 (C-8), 118.8 (C-6), 137.1 (C-7), 145.1 (C-9), 162.9 (C-5), 204.9 (C-4). IR (CHCl<sub>3</sub>) cm<sup>-1</sup>: 3619, 1619. GC-MS (70 eV): *m/z* 192 [M]<sup>+</sup> (50), 177 (10), 150 (25), 121 (100).

*Plumbagin* (4) [21]. Yellow amorphous solid. <sup>1</sup>H-NMR (CDCl<sub>3</sub>, 25 °C) δ (799.88 MHz, ppm): 2.19 (3H, *d*, *J* = 1.6 Hz, 2-CH<sub>3</sub>), 6.81 (1H, *q*, *J* = 1.6 Hz, H-3), 7.25 (1H, *d*, *J* = 1.2 Hz, H-6), 7.60 (1H, *t*, *J* = 7.9 Hz, H-7), 7.64 (1H, *dd*, *J* = 7.5, 1.2 Hz), 11.98 (1H, *s*, 5-OH). <sup>13</sup>C-NMR (CDCl<sub>3</sub>, 25 °C) δ (201.20 MHz, ppm): 16.7 (C-11), 115.3 (C-10), 119.5 (C-8), 124.3 (C-6), 132.2 (C-9), 135.6 (C-3), 136.3 (C-7), 149.8 (C-2), 162.0 (C-5) 185.0 (C-1), 190.4 (C-4). IR (CHCl<sub>3</sub>) cm<sup>-1</sup>: 3611, 1584. GC-MS (70eV): *m/z* 188 [M]<sup>+</sup> (100), 173 (25), 131 (45), 92 (25).

*3,3'-Biplumbagin* (5) [21]. Yellow amorphous solid. <sup>1</sup>H-NMR (CDCl<sub>3</sub>, 25 °C) δ (799.88 MHz, ppm): 2.08 (6H, *s*, 2-CH<sub>3</sub>), 7.30 (2H, *dd*, *J* = 1.3, 8.4 Hz, H-6 and H-6'), 7.67 (2H, *t*, *J* = 8.0 Hz, H-7 and H-7'), 7.77 (2H, *dd*, *J* = 1.3, 7.5 Hz, H-8 and H-8'), 11.81 (2H, *s*, 5-OH and 5'-OH). <sup>13</sup>C-NMR (CDCl<sub>3</sub>, 25 °C) δ (201.20 MHz, ppm): 16.7 (C-11 and C-11'), 115.3 (C-10 and C-10'), 119.5 (C-8 and C-8'), 124.3 (C-6 and C-6'), 132.2 (C-9 and C-9'), 135.6 (C-3 and C-3'), 136.3 (C-7 and C-7'), 149.8 (C-2 and C-2'), 161.3 (C-5 and C-5'), 184.9 (C-1 and C-1'), 190.4 (C-4 and C-4'). GC-MS (70eV): *m/z* 374 [M]<sup>+</sup> (96), 331 (47), 303 (75), 278 (47), 250 (47).

### 3. NAMFIS Analysis

**Table S1.** Monte Carlo conformational analysis for compounds 2 and 3.

| <i>trans</i> -Isoshinanolone (2) | <i>cis</i> -Isoshinanolone (3) |
|----------------------------------|--------------------------------|
| M σ% = 0.979D + 02               | M σ% = 0.614D + 02             |
| Conformation 1 = 10%             | Conformation 1 = 88%           |
| Conformation 2 = 81%             | Conformation 2 = 12%           |
| Conformation 3 = 1%              |                                |
| Conformation 4 = 9%              |                                |

All other molar fractions are 0.00.

**Tables S2.** Best fit solution for compounds 2 and 3.

| <i>trans</i> -Isoshinanolone (2) |      |       | <i>cis</i> -Isoshinanolone (3)   |      |       |
|----------------------------------|------|-------|----------------------------------|------|-------|
| Assign.                          | Exp. | Calc. | Assign.                          | Exp. | Calc. |
| <b>Interproton distances (Å)</b> |      |       | <b>Interproton distances (Å)</b> |      |       |
| H1-OH                            | 3.40 | 3.23  | H1-2                             | 2.10 | 2.40  |
| H1-H2                            | 2.80 | 2.82  | H1-Me                            | 2.80 | 2.85  |
| H3a-H1                           | 2.80 | 2.79  | H3a-H4                           | 3.50 | 3.50  |
| H3b-H2                           | 2.30 | 2.47  | H3a-Me                           | 2.60 | 2.79  |
| H3b-Me                           | 3.00 | 2.86  | H3b-Me                           | 2.90 | 2.85  |
| H3a-Me                           | 2.80 | 2.75  |                                  |      |       |
| RMSD = 0.40                      |      |       | RMSD = 0.16                      |      |       |
| <b>Coupling constants (Hz)</b>   |      |       | <b>Coupling constants (Hz)</b>   |      |       |
| H1-H2                            | 8.2  | 7.6   | H1-H2                            | 2.8  | 2.3   |
| H2-H3a                           | 4.6  | 4.1   | H2-H3a                           | 4.3  | 3.5   |
| H2-H3b                           | 10.1 | 10.4  | H2-H3b                           | 10.9 | 10.7  |
| RMSD = 0.47                      |      |       | RMSD = 0.55                      |      |       |

#### 4. Antioxidant Assay

**Table S3.** DPPH radical scavenging activity (RSA) of compounds isolated from *D. shimbaensis*.

| % RSA      | Concentration ( $\mu\text{M}$ ) |      |      |      |
|------------|---------------------------------|------|------|------|
|            | 25.0                            | 12.5 | 6.25 | 3.13 |
| Compound 1 | 41.2                            | 38.5 | 34.8 | 32.0 |
| Compound 2 | 43.9                            | 42.8 | 32.4 | 31.7 |
| Compound 3 | 58.7                            | 49.1 | 41.5 | 38.1 |
| Compound 4 | 40.5                            | 36.8 | 36.4 | 32.9 |
| Compound 5 | 42.6                            | 38.2 | 35.7 | 30.7 |

#### 5. Cytotoxicity Assay

**Table S4.** Cytotoxicity data of the constituents of *D. shimbaensis*, and of its crude extracts using various solvents. The data was obtained on a MDA-MB-231 breast cancer cell assay.

| Compound    | IC <sub>50</sub> ( $\mu\text{g/mL}$ ) | 95% Confidence Interval |
|-------------|---------------------------------------|-------------------------|
| 2           | >100                                  | -                       |
| 3           | 50.11848                              | -                       |
| 4           | 24.62663                              | 1.897 to 258.9          |
| 5           | 30.68116                              | 6.054 to 278.4          |
| DSL D Crude | 72.97427                              | -                       |
| DSRM Crude  | >100                                  | -                       |
| DSL M Crude | 44.74559                              | 24.03 to 697.8          |
| DSSM Crude  | 59.56605                              | 1.951 to 148502         |
| DSRH Crude  | 16.1141                               | 1.285 to 374.6          |
| DSRD Crude  | 29.74992                              | 8.371 to 133.2          |

DSSM (methanol crude extract from the stem barks); DSRH (isohehexane crude extract from the root barks); DSRD (dichloromethane crude extract from the root barks); DSRM (methanol crude extract from the root barks); DSLD (dichloromethane crude extract from the leaves); DSLM (methanol crude extract from the leaves).

#### References

1. Bringmann, G.; Pfeifer, R.M.; Breuning, M.; Reichert, M.; Messer, K.; Schraut, M.; Tóth, G. Structure of *trans*-isoshinanolone in the crystal and in solution. *Z. Naturforsch.* **2004**, *59*, 100–105.
